# Supplementary material
Source: publisher figshare collection journal article supplement (https://sage.figshare.com/ndownloader/files/32394235)
Supplement: Supplementary file 1 [file 32394235]

postcode	Huishoudens	Gemiddeld besteedbaar huishoudinkomen
1011	5 300	32 500
1012	4 500	27 800
1013	11 500	29 900
1014	100	21 100
1015	8 600	33 400
1016	6 300	35 600
1017	6 800	42 300
1018	10 500	31 700
1019	8 500	41 800
1021	3 400	24 100
1022	900	29 900
1023	2 200	31 400
1024	5 200	27 500
1025	6 800	29 000
1026	200	48 500
1027	200	41 500
1028	200	50 400
1031	2 500	26 000
1032	2 400	24 700
1033	5 400	27 000
1034	5 800	28 300
1035	4 200	34 700
1036	400	38 600
1037	100	.
1041	0	.
1042	0	.
1043	0	.
1044	0	.
1045	100	.
1046	0	.
1047	0	.
1051	7 100	28 900
1052	6 700	28 800
1053	8 900	27 400
1054	9 100	35 400
1055	9 800	26 200
1056	9 400	27 600
1057	8 700	26 800
1058	7 900	33 400
1059	3 200	31 700
1060	3 700	41 700
1061	4 500	26 400
1062	3 700	30 100
1063	5 500	25 700
1064	7 100	27 300
1065	4 900	27 300
1066	7 200	36 900
1067	7 100	29 000
1068	7 600	27 500
1069	10 200	28 800
1071	6 200	54 300
1072	7 600	28 800
1073	7 400	27 900
1074	4 400	28 900
1075	5 300	42 900
1076	5 700	33 800
1077	4 300	63 000
1078	7 400	36 600
1079	7 800	30 400
1081	2 700	39 200
1082	5 100	35 600
1083	3 200	33 600
1086	1 400	43 500
1087	6 100	41 500
1091	7 800	29 100
1092	4 200	28 100
1093	4 300	25 800
1094	6 300	25 700
1095	4 900	25 800
1096	600	40 900
1097	6 500	28 000
1098	6 000	41 400
1101	0	.
1102	10 500	23 300
1103	6 300	26 900
1104	6 000	24 200
1105	0	.
1106	8 300	28 400
1107	5 500	28 100
1108	1 700	28 500
1109	600	37 500
1111	5 800	34 500
1112	3 400	33 800
1113	1 500	41 200
1115	2 300	36 200
1117	0	.
1118	0	.
1119	0	.
1121	3 900	40 800
1127	300	48 700
1131	4 200	34 200
1132	4 100	49 100
1135	3 000	37 900
1141	4 100	39 500
1145	100	.
1151	1 000	47 100
1153	100	53 800
1154	100	.
1156	800	37 900
1161	3 300	35 000
1165	1 000	38 600
1171	5 300	41 700
1175	400	44 200
1181	8 500	45 400
1182	1 700	45 300
1183	5 300	34 500
1184	200	55 700
1185	5 200	34 800
1186	6 300	36 400
1187	6 500	44 600
1188	3 300	39 400
1189	200	47 300
1191	3 400	48 100
1211	4 600	29 400
1212	1 800	26 400
1213	2 500	58 300
1214	3 300	34 100
1215	4 400	39 900
1216	4 300	33 300
1217	3 100	58 400
1218	1 800	37 800
1221	3 700	29 000
1222	5 200	30 700
1223	4 500	33 600
1231	3 600	42 300
1241	2 800	40 800
1243	600	39 900
1244	600	40 400
1251	4 600	51 000
1252	100	45 400
1261	4 000	51 600
1271	3 500	38 400
1272	2 600	55 300
1273	4 000	34 900
1274	3 000	34 000
1275	900	36 200
1276	3 000	34 300
1277	900	44 900
1309	0	.
1311	2 000	34 700
1312	2 800	37 500
1313	1 800	36 100
1314	2 700	27 800
1315	1 900	27 800
1316	1 700	42 200
1317	1 700	31 000
1318	3 400	37 000
1319	1 900	44 800
1321	3 500	38 200
1322	0	.
1323	2 700	34 100
1324	4 400	28 200
1325	4 300	36 700
1326	4 400	36 600
1327	0	.
1328	3 800	36 500
1329	0	.
1331	100	.
1332	0	.
1333	5 100	32 700
1334	800	24 500
1335	4 500	36 700
1336	2 800	37 500
1338	4 000	34 600
1339	4 300	36 500
1343	500	63 500
1349	100	.
1351	800	40 800
1352	700	34 100
1353	2 300	25 500
1354	1 300	25 200
1355	1 200	31 900
1356	1 200	32 800
1357	1 700	31 500
1358	200	96 900
1359	600	56 800
1361	100	.
1363	3 300	32 300
1381	2 300	38 600
1382	4 500	32 900
1383	1 600	38 700
1391	3 000	50 400
1393	600	47 600
1394	2 100	41 300
1396	500	52 500
1398	1 500	38 900
1399	1 200	47 900
1401	1 900	55 300
1402	4 000	39 700
1403	4 400	31 600
1404	1 700	35 700
1405	1 100	67 200
1406	1 400	55 200
1411	4 300	43 900
1412	2 900	55 600
1421	2 600	34 100
1422	5 600	36 100
1423	2 300	44 900
1424	1 500	41 000
1426	400	49 000
1427	400	40 900
1428	0	.
1431	5 100	38 500
1432	3 600	44 600
1433	3 500	40 700
1435	1 700	38 100
1436	200	40 600
1437	0	.
1438	100	.
1441	6 500	32 900
1442	3 300	28 700
1443	3 400	27 400
1444	3 200	33 000
1445	4 100	31 700
1446	2 200	34 100
1447	5 100	40 700
1448	6 500	40 100
1451	200	50 000
1452	800	41 900
1454	200	42 000
1456	700	44 500
1458	100	.
1461	1 200	43 100
1462	1 900	38 600
1463	200	49 700
1464	300	45 000
1471	300	44 600
1472	300	44 200
1473	300	47 000
1474	1 300	38 700
1475	200	41 600
1476	0	.
1477	100	.
1481	0	.
1482	100	.
1483	1 600	37 800
1484	300	37 500
1485	0	.
1486	300	41 600
1487	100	36 000
1488	100	.
1489	100	.
1501	2 900	29 500
1502	3 900	28 300
1503	4 900	29 400
1504	3 300	27 600
1505	2 800	28 200
1506	5 600	33 900
1507	4 800	38 000
1508	2 200	27 400
1509	2 900	34 700
1511	3 800	39 300
1521	5 300	29 100
1525	200	38 700
1531	5 400	35 900
1534	200	41 300
1536	100	45 400
1541	4 900	36 200
1544	3 800	34 700
1546	300	45 600
1551	1 900	40 200
1561	3 900	29 900
1562	3 800	37 700
1566	5 200	38 200
1567	3 200	40 800
1601	3 600	32 900
1602	4 600	32 400
1606	1 700	37 000
1607	600	37 100
1608	600	40 500
1609	0	.
1611	4 200	35 200
1613	3 700	34 000
1614	900	36 100
1616	3 200	36 100
1617	700	39 000
1619	2 700	34 900
1621	2 900	33 800
1622	3 500	30 100
1623	1 200	35 300
1624	2 400	32 200
1625	4 300	34 100
1627	0	.
1628	8 700	34 000
1631	200	41 800
1633	1 400	36 900
1634	200	34 200
1636	500	36 100
1641	400	33 700
1642	0	.
1643	200	42 400
1645	1 100	39 100
1646	0	.
1647	1 000	38 200
1648	1 200	34 300
1652	200	41 600
1654	300	38 300
1655	400	35 400
1657	900	35 500
1658	100	.
1661	100	42 000
1662	100	31 600
1663	0	.
1671	3 700	32 000
1674	800	34 800
1676	400	38 900
1678	400	40 300
1679	1 000	35 500
1681	100	.
1682	100	.
1683	100	.
1684	200	38 300
1685	200	40 100
1686	0	.
1687	2 100	39 100
1688	900	36 700
1689	6 400	33 900
1691	300	40 700
1692	0	.
1693	3 100	35 400
1695	1 800	40 000
1696	600	42 200
1697	400	38 900
1701	3 400	34 800
1702	3 400	34 400
1703	5 600	32 000
1704	2 600	39 000
1705	6 200	37 400
1711	700	36 700
1713	2 300	37 400
1715	1 500	36 100
1716	900	36 800
1718	1 600	37 000
1719	200	36 800
1721	1 900	42 500
1722	2 500	38 900
1723	2 200	34 200
1724	1 600	37 200
1731	1 300	35 700
1732	300	35 500
1733	1 400	35 400
1734	200	47 600
1735	800	36 800
1736	100	42 600
1738	1 000	37 400
1741	5 300	33 400
1742	2 900	36 000
1744	800	39 100
1746	700	34 700
1747	1 500	35 800
1749	2 500	38 800
1751	800	39 500
1752	300	39 700
1753	300	31 700
1754	300	34 600
1755	700	35 100
1756	900	33 800
1757	300	35 200
1759	1 100	34 500
1761	3 400	34 100
1764	1 500	35 800
1766	900	35 100
1767	400	34 300
1768	400	37 400
1769	100	.
1771	2 600	34 100
1773	200	29 200
1774	800	35 500
1775	1 500	34 900
1777	2 300	32 700
1778	400	39 500
1779	1 000	34 500
1781	4 600	27 000
1782	5 100	29 500
1783	1 600	27 400
1784	4 300	28 600
1785	4 600	30 600
1786	100	.
1787	1 200	25 200
1788	5 100	37 100
1789	200	43 300
1791	3 300	30 600
1792	500	35 600
1793	200	38 100
1794	600	33 800
1795	500	33 700
1796	600	32 000
1797	400	36 900
1811	2 700	30 700
1812	100	36 500
1813	3 600	27 000
1814	4 300	31 800
1815	3 400	35 100
1816	4 200	29 300
1817	1 500	38 300
1821	600	29 100
1822	1 600	41 900
1823	3 100	32 900
1824	3 500	31 100
1825	4 600	29 200
1826	3 000	32 900
1827	4 600	34 600
1829	1 800	37 600
1831	1 100	34 600
1832	100	.
1834	2 400	38 500
1841	800	37 600
1842	300	39 700
1843	300	45 800
1844	100	.
1846	200	41 400
1847	100	.
1851	5 100	40 700
1852	4 500	39 600
1861	2 900	47 000
1862	2 700	36 500
1865	200	48 700
1871	2 100	39 800
1873	700	36 900
1901	6 200	38 100
1902	3 800	42 300
1906	2 700	42 300
1911	5 300	39 100
1921	1 900	39 700
1931	2 300	33 300
1934	1 500	39 800
1935	1 100	37 400
1941	1 900	26 300
1942	1 100	39 300
1943	2 200	34 900
1944	3 300	31 100
1945	3 000	30 700
1946	2 000	27 900
1947	1 600	29 700
1948	2 000	43 000
1949	1 000	34 300
1951	2 400	28 800
1961	600	28 700
1962	3 500	30 100
1963	2 400	39 000
1964	3 200	34 900
1965	2 400	43 600
1966	2 500	27 900
1967	1 700	43 000
1968	100	43 600
1969	400	41 400
1971	4 000	31 600
1972	3 700	29 000
1973	2 500	30 300
1974	2 900	29 900
1975	1 200	26 500
1976	200	35 400
1981	900	45 600
1985	1 200	49 500
1991	5 300	40 500
1992	800	41 400
2011	7 100	33 700
2012	5 600	45 700
2013	3 800	35 400
2014	3 200	37 600
2015	2 200	44 600
2019	100	.
2021	4 100	30 600
2022	3 600	33 500
2023	4 900	42 300
2024	3 800	39 000
2025	4 400	31 600
2026	2 400	34 600
2031	700	38 800
2032	4 000	29 000
2033	5 600	28 600
2034	5 000	28 000
2035	2 700	28 300
2036	3 700	32 700
2037	3 700	27 500
2041	3 700	30 900
2042	4 000	33 800
2051	1 600	59 600
2061	2 700	54 800
2063	300	37 000
2064	1 100	41 700
2065	100	42 300
2071	3 000	40 500
2082	1 400	48 600
2101	3 400	43 800
2102	2 000	60 600
2103	1 400	44 900
2104	1 600	40 700
2105	1 700	41 400
2106	1 200	58 200
2111	1 700	76 000
2114	1 000	39 900
2116	400	56 300
2121	2 200	44 600
2131	4 400	40 000
2132	4 900	35 600
2133	3 300	38 200
2134	10 900	40 200
2135	5 900	40 600
2136	700	43 800
2141	1 800	44 700
2142	400	40 700
2143	100	.
2144	400	40 600
2151	6 000	41 100
2152	4 500	41 600
2153	1 400	34 300
2154	100	37 400
2155	0	.
2156	200	41 800
2157	500	37 800
2158	200	38 200
2159	200	47 100
2161	5 300	35 600
2162	3 100	37 900
2163	1 300	38 100
2165	1 300	41 300
2171	4 200	38 500
2172	2 400	38 500
2181	3 900	35 500
2182	5 100	36 400
2191	900	36 700
2201	5 400	38 000
2202	3 800	40 200
2203	1 700	35 500
2204	300	36 400
2211	5 700	36 600
2215	5 600	43 800
2221	5 500	33 700
2222	0	.
2223	2 400	35 900
2224	3 700	34 500
2225	5 200	36 700
2231	5 500	39 400
2235	1 800	40 700
2241	4 400	37 200
2242	3 800	49 700
2243	1 200	96 900
2244	700	99 000
2245	900	46 300
2251	4 700	40 600
2252	2 100	45 800
2253	3 400	42 000
2254	300	48 000
2261	2 300	41 000
2262	1 700	25 700
2263	2 700	27 200
2264	3 700	40 600
2265	1 900	41 400
2266	2 700	35 800
2267	200	67 700
2271	2 900	50 000
2272	3 700	41 900
2273	5 300	28 900
2274	5 500	33 800
2275	1 800	49 200
2281	1 900	44 900
2282	5 300	31 400
2283	3 000	29 900
2284	2 700	27 200
2285	3 600	37 000
2286	3 800	32 800
2287	2 100	28 300
2288	500	39 400
2289	700	42 100
2291	5 100	36 000
2292	1 100	43 300
2295	1 500	39 100
2311	4 100	35 500
2312	6 200	28 200
2313	5 400	40 600
2314	2 600	41 300
2315	3 800	26 600
2316	3 800	29 900
2317	4 600	37 400
2318	1 300	46 100
2321	4 100	29 400
2322	100	.
2323	100	.
2324	4 700	29 100
2331	4 600	38 200
2332	4 600	31 400
2333	500	52 300
2334	900	46 000
2341	4 000	50 300
2342	700	41 500
2343	5 000	42 200
2351	2 000	44 200
2352	3 800	34 300
2353	5 700	40 500
2355	700	39 300
2361	2 000	44 000
2362	100	.
2371	3 000	38 800
2374	300	41 500
2375	600	38 500
2376	300	39 900
2377	1 600	39 400
2381	2 100	40 700
2382	1 000	41 200
2391	2 200	41 800
2394	2 200	36 900
2396	1 700	40 300
2401	4 100	37 500
2402	6 100	33 400
2403	4 400	35 400
2404	2 200	29 300
2405	3 300	36 300
2406	3 600	35 900
2407	300	40 100
2408	5 900	43 800
2409	0	.
2411	6 900	38 800
2412	100	.
2415	700	44 500
2421	3 500	39 600
2431	600	40 700
2432	100	.
2435	1 200	39 000
2441	1 700	33 800
2445	500	43 300
2451	1 900	39 700
2461	3 600	39 200
2465	500	42 900
2471	600	43 200
2481	1 400	41 400
2491	100	46 300
2492	4 500	43 500
2493	2 500	43 200
2495	100	.
2496	3 500	45 700
2497	3 700	39 600
2498	1 800	47 600
2511	2 000	29 400
2512	6 700	24 800
2513	3 700	29 600
2514	1 700	46 100
2515	5 200	24 300
2516	3 500	22 900
2517	4 100	42 000
2518	5 000	31 900
2521	3 200	24 700
2522	5 500	24 100
2523	2 400	25 200
2524	2 800	25 600
2525	6 100	24 100
2526	5 200	23 100
2531	4 200	22 800
2532	2 700	21 100
2533	3 600	21 800
2541	4 000	22 500
2542	4 400	25 300
2543	2 900	25 300
2544	5 300	24 100
2545	5 200	27 600
2546	2 800	29 100
2547	3 800	27 300
2548	7 200	41 200
2551	5 500	29 500
2552	6 900	33 400
2553	3 700	33 900
2554	800	46 700
2555	4 900	31 400
2561	2 500	31 800
2562	5 300	25 700
2563	5 000	29 000
2564	5 000	37 400
2565	5 800	34 500
2566	2 700	53 300
2571	5 000	21 700
2572	3 500	24 600
2573	4 500	25 400
2574	3 300	26 700
2581	1 400	37 800
2582	3 600	50 800
2583	5 000	27 900
2584	3 200	31 400
2585	3 100	51 800
2586	3 800	32 900
2587	3 300	43 100
2591	3 600	26 800
2592	3 700	26 500
2593	4 500	32 200
2594	800	50 900
2595	3 300	35 300
2596	3 000	60 000
2597	3 800	53 000
2611	5 100	35 200
2612	4 200	29 800
2613	5 500	32 500
2614	4 400	36 700
2616	0	.
2622	3 500	36 000
2623	2 800	33 500
2624	5 400	27 000
2625	5 900	28 800
2626	0	.
2627	600	38 600
2628	3 900	31 300
2629	100	34 500
2631	5 400	44 700
2632	1 300	40 800
2635	2 800	41 700
2636	1 700	42 700
2641	5 100	38 500
2642	2 700	46 800
2643	900	30 900
2645	3 300	44 400
2651	6 900	42 300
2652	3 600	45 200
2661	4 900	47 100
2662	1 600	41 900
2665	4 300	42 300
2671	5 800	35 200
2672	1 600	41 300
2673	800	46 000
2675	3 000	37 000
2676	1 900	34 100
2678	4 700	38 400
2681	5 700	36 800
2684	200	30 700
2685	2 400	34 700
2691	5 600	36 200
2692	1 300	39 400
2693	400	41 700
2694	1 100	42 200
2711	2 300	30 100
2712	2 500	32 100
2713	3 200	30 500
2715	2 700	28 100
2716	4 400	33 000
2717	3 300	31 000
2718	3 600	39 600
2719	4 900	43 900
2721	3 700	40 900
2722	2 900	26 100
2723	1 700	34 100
2724	3 200	35 500
2725	2 500	42 800
2726	2 700	36 000
2727	2 100	36 900
2728	3 500	41 300
2729	3 800	40 000
2731	1 300	40 200
2735	0	.
2741	4 300	36 300
2742	3 300	36 000
2743	2 800	42 100
2751	1 300	41 400
2752	200	39 400
2761	2 700	39 900
2771	6 200	37 700
2801	3 600	33 100
2802	4 100	29 200
2803	4 000	38 200
2804	5 400	36 500
2805	4 400	34 500
2806	4 300	32 700
2807	4 200	39 900
2808	200	43 500
2809	100	.
2811	4 000	44 900
2821	1 900	40 000
2825	600	46 700
2831	1 000	37 200
2841	3 200	38 700
2851	1 700	39 300
2855	200	38 700
2861	2 700	38 900
2865	700	35 200
2871	5 000	35 900
2901	3 700	44 700
2902	3 700	34 300
2903	3 900	29 500
2904	3 500	38 900
2905	3 000	29 300
2906	2 500	31 900
2907	6 500	32 200
2908	1 500	34 900
2909	1 000	43 700
2911	2 500	46 600
2912	2 800	38 500
2913	200	54 300
2914	3 400	39 600
2921	800	42 400
2922	2 900	32 900
2923	2 600	34 700
2924	1 700	39 700
2925	2 800	40 700
2926	1 000	44 000
2931	2 800	36 900
2935	2 200	39 500
2941	3 200	37 300
2951	4 200	34 100
2952	300	46 300
2953	2 400	33 400
2954	1 000	43 400
2957	3 000	37 400
2959	900	42 300
2961	300	37 600
2964	1 600	40 200
2965	600	35 000
2967	600	39 900
2968	0	.
2969	800	44 300
2971	1 000	41 800
2973	400	44 000
2974	500	41 300
2975	300	48 200
2977	300	44 700
2981	1 500	31 300
2982	3 100	27 700
2983	3 800	35 800
2984	1 200	42 000
2985	2 000	33 400
2986	3 400	37 800
2987	3 500	32 300
2988	1 200	45 000
2989	300	44 600
2991	5 100	40 100
2992	5 500	41 500
2993	5 600	42 600
2994	2 300	42 500
2995	1 600	39 600
3011	7 600	33 800
3012	2 400	27 500
3013	500	38 900
3014	3 700	22 300
3015	1 100	32 700
3016	600	52 700
3021	5 100	27 900
3022	4 100	25 800
3023	3 900	26 800
3024	4 000	28 400
3025	3 100	24 300
3026	3 200	22 200
3027	4 100	26 000
3028	3 800	23 300
3029	1 400	23 900
3031	4 100	25 800
3032	3 100	27 200
3033	2 200	28 200
3034	5 000	23 200
3035	3 200	23 500
3036	3 700	23 300
3037	3 600	29 500
3038	4 300	25 500
3039	5 300	33 100
3041	0	.
3042	3 800	25 900
3043	3 200	33 000
3044	100	.
3045	500	42 800
3046	100	42 400
3047	0	.
3051	3 500	37 600
3052	2 600	28 500
3053	4 800	32 700
3054	3 600	43 000
3055	3 200	56 400
3056	1 300	48 900
3059	4 300	46 700
3061	7 200	27 700
3062	2 900	58 000
3063	4 200	30 600
3064	700	35 100
3065	3 200	51 000
3066	5 300	32 400
3067	10 500	28 600
3068	10 100	30 300
3069	9 400	31 600
3071	8 800	28 900
3072	6 300	26 400
3073	5 900	23 300
3074	4 700	24 200
3075	6 300	25 000
3076	6 600	25 600
3077	7 500	31 300
3078	5 800	25 900
3079	7 700	27 400
3081	5 500	22 800
3082	5 300	25 000
3083	6 700	23 500
3084	1 200	24 200
3085	6 100	24 900
3086	5 500	24 500
3087	900	26 400
3088	0	.
3089	700	27 800
3111	2 300	31 700
3112	5 200	25 700
3113	0	.
3114	2 900	27 800
3115	0	.
3116	1 300	44 500
3117	4 000	29 400
3118	2 200	26 100
3119	4 200	27 000
3121	1 400	38 100
3122	4 500	26 500
3123	3 200	35 500
3124	3 100	46 000
3125	100	35 900
3131	7 400	29 300
3132	5 700	28 100
3133	600	26 000
3134	3 100	33 400
3135	5 000	34 300
3136	4 900	29 600
3137	6 000	37 600
3138	0	.
3141	3 200	29 800
3142	2 500	33 000
3143	1 100	35 900
3144	2 700	32 600
3145	2 600	35 500
3146	2 000	42 100
3147	0	.
3151	4 600	34 700
3155	2 600	43 900
3161	3 500	41 200
3162	2 600	44 100
3171	2 400	41 300
3172	300	42 500
3176	1 000	47 500
3181	5 600	33 900
3191	4 200	34 500
3192	5 700	28 700
3193	2 800	29 800
3194	2 600	32 100
3195	2 100	33 200
3197	0	.
3198	0	.
3201	5 800	31 300
3202	3 500	29 000
3203	1 700	30 500
3204	3 500	31 400
3205	3 400	36 700
3206	4 500	31 100
3207	6 500	41 200
3208	2 700	34 000
3209	600	42 600
3211	800	39 600
3212	200	37 000
3214	2 200	39 700
3216	600	41 000
3218	1 000	40 300
3221	2 400	35 800
3222	1 800	33 200
3223	5 500	42 600
3224	3 700	33 300
3225	3 600	32 400
3227	500	38 400
3231	1 700	37 400
3232	4 000	37 800
3233	3 200	44 300
3234	200	43 300
3235	2 800	41 000
3237	700	39 500
3238	800	40 000
3241	3 100	33 900
3243	600	36 900
3244	1 000	35 700
3245	3 000	36 300
3247	2 000	37 300
3248	900	35 900
3249	500	34 100
3251	1 500	35 300
3252	900	41 300
3253	2 200	41 200
3255	2 000	36 200
3256	500	35 400
3257	1 100	34 500
3258	700	35 800
3261	3 800	40 100
3262	3 700	37 200
3263	1 900	42 400
3264	1 400	41 200
3265	600	38 700
3267	800	37 700
3271	1 800	47 200
3273	900	41 200
3274	1 500	38 900
3281	3 700	39 200
3284	1 500	37 600
3286	1 700	39 700
3291	3 300	37 800
3292	200	37 700
3293	200	31 700
3295	3 700	36 200
3297	2 900	36 400
3299	1 300	42 700
3311	8 100	31 600
3312	4 900	32 200
3313	2 600	26 600
3314	7 100	27 500
3315	7 700	38 600
3316	300	39 500
3317	7 300	26 200
3318	2 900	27 800
3319	4 200	40 700
3328	7 000	35 700
3329	800	57 800
3331	4 900	31 300
3332	4 600	34 200
3333	3 200	29 500
3334	2 800	34 800
3335	2 600	42 900
3336	0	.
3341	3 000	35 400
3342	2 400	39 300
3343	2 600	39 700
3344	3 200	41 900
3351	4 000	35 000
3352	1 400	39 900
3353	2 900	30 000
3354	1 100	36 900
3355	2 400	40 600
3356	1 900	41 400
3361	2 500	37 800
3362	4 900	32 300
3363	2 400	35 700
3364	100	.
3366	200	44 400
3371	4 700	37 800
3372	1 800	35 900
3373	400	41 500
3381	1 800	45 000
3401	5 100	39 800
3402	4 100	34 800
3403	800	46 200
3404	3 900	41 900
3405	1 200	42 000
3411	3 000	38 800
3412	400	38 400
3413	100	39 300
3415	400	38 900
3417	3 900	40 500
3421	3 300	38 000
3425	300	53 000
3431	3 800	29 500
3432	2 500	31 600
3433	1 500	35 900
3434	3 600	35 900
3435	2 600	36 900
3436	2 600	37 200
3437	5 900	37 100
3438	4 100	36 900
3439	100	40 100
3441	1 100	32 400
3442	1 800	34 000
3443	3 200	35 100
3444	100	54 800
3445	1 500	43 100
3446	3 100	45 600
3447	0	.
3448	3 800	39 400
3449	300	38 400
3451	4 100	41 000
3452	4 600	43 800
3453	3 400	42 300
3454	4 700	41 300
3455	200	47 600
3461	1 400	43 100
3464	100	47 000
3465	700	41 100
3466	600	42 100
3467	300	42 000
3471	1 400	43 800
3474	900	40 900
3481	3 200	42 100
3511	4 700	33 500
3512	4 000	34 200
3513	2 600	28 600
3514	3 300	37 700
3515	2 400	33 000
3521	2 400	40 000
3522	4 000	33 600
3523	4 200	32 500
3524	5 300	31 100
3525	2 200	32 100
3526	4 400	25 400
3527	4 500	26 300
3528	0	.
3531	5 100	30 000
3532	3 100	31 400
3533	3 200	41 600
3534	500	34 700
3541	400	34 000
3542	100	.
3543	3 100	42 500
3544	7 100	40 600
3545	100	.
3546	100	.
3551	3 300	27 300
3552	3 100	27 400
3553	3 300	29 100
3554	3 200	28 800
3555	3 600	29 300
3561	3 600	26 100
3562	3 200	24 700
3563	2 800	25 900
3564	4 500	25 200
3565	0	.
3566	100	40 000
3571	3 600	46 500
3572	5 100	38 200
3573	1 500	41 200
3581	4 300	39 900
3582	3 700	31 400
3583	2 500	47 300
3584	1 300	43 000
3585	100	.
3601	3 200	35 700
3602	1 400	51 600
3603	1 000	50 700
3604	900	47 700
3605	2 500	29 800
3606	0	.
3607	5 400	39 900
3608	1 400	36 900
3611	200	61 200
3612	800	38 800
3615	500	43 600
3621	4 500	40 600
3625	100	.
3626	200	42 200
3628	1 300	41 000
3631	200	50 300
3632	1 800	45 400
3633	800	46 600
3634	200	47 300
3641	5 000	37 400
3642	1 300	41 800
3643	600	46 200
3645	3 500	41 500
3646	300	45 300
3648	2 500	42 100
3651	0	.
3652	200	47 200
3653	0	.
3701	3 000	35 300
3702	1 600	36 500
3703	2 500	41 900
3704	3 800	36 100
3705	3 800	35 700
3706	2 600	28 500
3707	2 200	57 700
3708	2 600	38 800
3709	200	39 000
3711	600	41 800
3712	900	39 700
3721	3 600	35 200
3722	2 100	45 300
3723	4 100	54 800
3731	2 600	40 700
3732	2 100	35 000
3734	1 700	43 400
3735	600	81 800
3737	700	48 100
3738	2 000	38 900
3739	600	48 700
3741	3 900	35 700
3742	4 200	35 800
3743	2 200	51 400
3744	500	29 200
3749	100	36 100
3751	2 600	38 600
3752	4 600	39 400
3754	300	47 200
3755	3 600	40 100
3761	2 300	44 500
3762	3 700	35 300
3763	900	45 100
3764	2 300	35 300
3765	2 300	31 500
3766	3 100	39 100
3768	2 400	48 400
3769	2 700	36 100
3771	4 100	37 100
3772	5 800	35 600
3773	1 300	39 600
3774	1 500	41 700
3775	100	41 500
3776	500	41 300
3781	3 900	38 300
3784	500	40 600
3785	400	40 100
3791	900	41 000
3792	0	.
3794	200	45 300
3811	3 400	31 500
3812	5 300	30 100
3813	6 800	33 300
3814	2 700	29 000
3815	4 600	30 100
3816	5 100	29 600
3817	5 100	39 100
3818	4 100	47 800
3819	100	.
3821	100	.
3822	3 300	38 100
3823	4 600	40 500
3824	5 600	42 900
3825	4 000	43 900
3826	2 000	39 300
3828	4 200	41 500
3829	1 600	41 600
3831	5 500	39 700
3832	1 800	47 100
3833	2 800	40 000
3834	900	40 200
3835	100	42 500
3836	100	.
3841	2 900	32 300
3842	2 800	30 800
3843	2 700	32 000
3844	4 000	34 300
3845	3 500	38 900
3846	0	.
3847	200	38 700
3848	1 600	38 600
3849	1 100	41 100
3851	4 600	35 800
3852	2 100	41 800
3853	4 100	34 000
3861	3 100	33 200
3862	5 000	37 100
3863	2 800	38 500
3864	1 300	39 000
3871	3 600	41 800
3881	4 600	38 500
3882	4 700	37 400
3886	700	41 900
3888	900	43 100
3891	2 100	34 600
3892	2 300	39 100
3893	2 300	41 800
3894	900	36 600
3896	200	35 800
3897	200	71 700
3898	100	.
3899	0	.
3901	4 600	26 400
3902	4 100	35 100
3903	2 700	38 600
3904	5 300	37 600
3905	5 700	33 200
3906	2 700	42 400
3907	500	38 500
3911	5 600	36 700
3912	200	38 900
3921	1 600	37 300
3922	100	51 100
3925	3 600	37 100
3927	1 800	39 200
3931	4 700	38 800
3941	4 100	43 000
3945	1 200	38 400
3947	800	44 000
3951	2 000	43 400
3953	500	45 500
3956	3 100	38 900
3958	2 300	37 800
3959	400	41 900
3961	3 900	37 600
3962	3 400	41 000
3971	3 300	45 500
3972	4 300	39 000
3981	2 800	43 100
3984	2 300	42 100
3985	900	42 400
3989	0	.
3991	6 500	44 400
3992	2 500	44 600
3993	2 100	36 900
3994	4 900	46 300
3995	1 400	29 300
3997	200	42 700
3998	700	42 700
3999	300	42 700
4001	5 100	28 000
4002	1 000	40 000
4003	3 400	35 600
4004	0	.
4005	2 200	32 800
4006	1 700	26 800
4007	3 300	40 700
4011	600	40 200
4012	600	41 000
4013	300	40 900
4014	400	40 500
4016	100	.
4017	100	.
4021	1 600	36 700
4023	300	41 200
4024	700	37 900
4031	900	38 700
4032	300	43 900
4033	2 200	37 900
4041	1 800	36 700
4043	2 000	38 100
4051	1 800	35 900
4053	400	38 300
4054	400	39 200
4061	600	42 600
4062	100	.
4063	200	36 900
4064	400	40 100
4101	3 200	35 400
4102	3 600	32 300
4103	600	37 700
4104	0	.
4105	3 900	40 300
4106	0	.
4107	100	37 300
4111	300	42 900
4112	1 200	43 300
4115	100	41 300
4116	1 100	39 300
4117	200	43 800
4119	200	38 100
4121	500	42 500
4122	300	42 700
4124	600	44 900
4126	400	40 000
4128	1 100	38 300
4131	2 000	28 800
4132	2 000	39 000
4133	2 700	39 400
4141	2 300	34 700
4142	2 600	27 800
4143	2 500	39 400
4145	600	39 800
4147	1 200	38 500
4151	200	41 900
4152	300	42 200
4153	1 400	38 200
4155	100	42 600
4156	400	43 800
4157	200	41 800
4158	800	43 200
4161	900	39 000
4163	100	.
4171	1 000	39 300
4174	400	39 600
4175	1 000	37 100
4176	300	44 200
4181	800	37 100
4182	200	54 400
4184	500	40 700
4185	200	40 700
4191	4 300	37 600
4194	1 300	41 600
4196	800	39 800
4197	400	39 000
4201	2 900	31 700
4202	0	.
4203	100	.
4204	2 800	25 300
4205	4 000	32 500
4206	1 000	29 700
4207	3 900	43 500
4208	200	45 300
4209	500	43 600
4211	300	41 600
4212	0	.
4213	300	45 900
4214	800	38 000
4221	600	40 400
4223	700	42 500
4225	700	43 300
4231	1 500	39 500
4233	1 200	35 700
4235	300	43 700
4241	1 400	36 200
4243	400	40 500
4245	500	44 300
4247	300	40 800
4251	4 100	37 700
4254	2 100	42 100
4255	1 400	35 800
4261	2 200	39 900
4264	900	37 900
4265	700	38 000
4266	300	39 400
4267	200	37 800
4268	300	38 700
4269	200	39 900
4271	1 000	38 700
4273	1 600	37 100
4281	900	38 300
4283	600	37 700
4284	700	37 400
4285	1 900	37 800
4286	1 400	39 100
4287	100	.
4288	100	38 400
4301	4 300	31 600
4302	400	38 100
4303	300	43 500
4305	300	36 300
4306	1 100	36 200
4307	900	34 700
4308	100	36 900
4311	1 600	38 200
4315	400	35 300
4316	300	36 600
4317	300	42 600
4318	700	31 100
4321	400	35 500
4322	600	35 500
4323	100	38 300
4325	800	35 400
4326	100	35 100
4327	100	31 000
4328	2 100	38 200
4331	3 300	32 500
4332	2 000	32 600
4333	2 100	39 000
4334	1 400	34 000
4335	3 200	28 300
4336	3 100	33 500
4337	3 500	31 000
4338	0	.
4339	600	34 200
4341	2 000	37 100
4351	700	39 800
4352	200	40 200
4353	700	36 400
4354	500	34 700
4356	1 100	37 500
4357	700	33 700
4361	1 200	33 800
4363	500	38 000
4364	600	36 100
4365	500	36 500
4371	1 500	37 600
4373	400	37 000
4374	700	36 900
4381	3 900	25 700
4382	4 200	26 200
4383	1 400	27 400
4384	2 600	34 000
4385	2 300	33 300
4386	1 500	38 700
4387	200	44 000
4388	4 500	31 000
4389	200	38 100
4401	2 600	36 300
4411	1 300	33 500
4413	1 600	34 700
4414	400	37 800
4415	200	40 000
4416	1 500	34 600
4417	800	30 300
4421	3 400	38 700
4423	200	37 000
4424	1 300	35 700
4431	1 700	36 100
4433	300	36 400
4434	400	36 200
4435	300	37 300
4436	300	38 200
4437	200	32 400
4438	200	37 000
4441	500	35 800
4443	300	40 700
4444	200	40 100
4451	2 300	36 800
4453	900	34 600
4454	500	34 300
4455	500	34 300
4456	700	35 800
4458	700	36 700
4461	5 800	29 300
4462	3 100	31 900
4463	2 800	30 700
4464	600	45 700
4465	400	65 500
4471	1 000	34 700
4472	500	40 900
4474	200	41 600
4475	300	37 800
4481	1 300	39 700
4482	0	.
4484	900	33 700
4485	200	38 000
4486	700	29 900
4491	600	31 000
4493	1 000	34 500
4494	200	31 500
4501	2 200	31 800
4503	500	33 300
4504	200	36 800
4505	300	30 500
4506	400	34 100
4507	700	32 100
4508	200	37 200
4511	2 200	32 500
4513	400	33 900
4515	1 000	36 500
4521	700	37 400
4522	100	.
4524	1 100	33 100
4525	200	31 900
4527	1 100	32 500
4528	100	39 900
4529	400	33 100
4531	1 500	25 100
4532	3 400	30 600
4533	1 100	47 800
4535	2 000	39 300
4536	1 500	26 800
4537	1 800	30 200
4538	100	29 000
4539	100	.
4541	1 100	30 400
4542	1 200	33 800
4543	1 200	35 900
4551	1 900	29 400
4553	900	37 500
4554	900	33 800
4561	4 600	32 500
4562	400	47 700
4564	1 400	34 600
4565	200	36 700
4566	500	38 600
4567	1 100	31 500
4568	400	35 900
4569	400	34 400
4571	3 600	32 000
4574	400	36 500
4575	100	.
4576	1 100	35 400
4581	800	35 600
4583	200	33 900
4584	100	.
4585	300	35 800
4586	200	34 700
4587	1 400	33 900
4588	200	39 000
4589	100	37 200
4611	4 200	31 100
4612	100	.
4613	1 700	33 800
4614	3 100	35 800
4615	2 600	29 900
4616	100	32 700
4617	3 100	41 800
4621	2 100	25 100
4622	200	36 800
4623	1 800	30 200
4624	2 700	30 200
4625	1 400	32 700
4631	3 800	35 100
4634	600	37 300
4635	900	41 000
4641	2 200	35 900
4645	1 700	33 400
4651	5 200	35 000
4652	100	37 500
4655	300	38 700
4661	5 000	37 800
4664	800	36 300
4671	2 400	35 200
4675	1 100	34 300
4681	1 000	36 000
4691	3 000	35 900
4693	700	34 700
4694	700	33 300
4695	1 500	31 200
4696	700	32 400
4697	1 400	34 000
4698	1 100	34 700
4701	3 300	29 100
4702	5 900	30 100
4703	3 500	27 000
4704	100	.
4705	100	36 100
4706	4 500	39 600
4707	6 900	31 600
4708	5 000	40 600
4709	700	37 700
4711	3 900	33 100
4714	2 100	36 400
4715	2 000	37 200
4721	500	37 600
4722	100	.
4724	2 000	37 900
4725	500	39 500
4726	800	37 200
4727	200	43 200
4731	5 200	33 200
4735	800	35 900
4741	2 600	40 300
4744	1 000	38 300
4751	2 900	37 500
4754	500	34 400
4756	1 000	37 200
4758	900	38 300
4759	400	42 900
4761	5 800	35 900
4762	200	39 900
4765	700	36 700
4766	0	.
4771	200	41 100
4772	100	41 500
4781	200	33 600
4782	300	33 400
4791	2 400	35 500
4793	2 400	34 900
4794	400	38 300
4796	100	49 800
4797	1 300	39 900
4811	8 200	30 000
4812	4 700	27 000
4813	3 400	34 600
4814	4 700	30 900
4815	1 500	33 800
4816	2 200	25 900
4817	6 800	31 300
4818	3 600	45 100
4819	1 600	37 800
4822	3 500	33 900
4823	3 700	39 100
4824	3 800	35 300
4825	100	.
4826	4 100	27 200
4827	3 200	26 100
4834	5 300	35 000
4835	2 800	47 300
4836	200	44 500
4837	1 000	52 300
4838	400	51 200
4839	100	55 700
4841	4 600	41 800
4844	2 500	38 800
4845	800	39 800
4847	2 900	42 600
4849	900	39 100
4851	1 900	46 400
4854	3 000	45 200
4855	400	41 300
4856	100	50 000
4858	100	54 000
4859	0	.
4861	1 600	39 000
4871	6 500	36 500
4872	4 000	32 900
4873	2 600	36 300
4874	1 100	39 400
4875	800	33 400
4876	2 600	36 000
4877	0	.
4878	0	.
4879	100	.
4881	3 500	33 200
4882	900	42 800
4884	1 200	34 100
4885	700	37 700
4891	2 600	37 200
4901	4 900	32 100
4902	4 000	32 900
4903	100	32 600
4904	5 000	36 000
4905	300	37 500
4906	1 100	41 200
4907	4 400	37 200
4908	1 400	39 200
4909	500	43 600
4911	400	47 000
4921	4 900	36 300
4924	200	45 300
4926	1 700	39 000
4927	700	40 800
4931	3 100	33 600
4941	3 800	34 700
4942	1 500	39 900
4944	800	38 800
5011	5 100	27 000
5012	1 800	32 900
5013	300	28 500
5014	5 000	27 100
5015	300	40 800
5017	2 100	35 100
5018	1 400	34 700
5021	5 600	26 400
5022	3 300	27 000
5025	6 100	24 500
5026	100	.
5032	2 500	48 800
5035	2 500	37 100
5036	2 500	41 300
5037	4 100	34 000
5038	6 500	28 700
5041	3 800	27 700
5042	5 600	25 500
5043	3 900	33 700
5044	3 800	27 900
5045	6 800	41 000
5046	5 600	26 500
5047	100	.
5048	0	.
5049	3 000	26 900
5051	6 300	36 900
5052	1 400	39 200
5053	700	41 900
5056	4 200	43 400
5059	100	46 100
5061	5 500	32 900
5062	2 300	50 000
5063	500	37 300
5066	2 400	39 100
5071	3 100	39 400
5074	400	44 500
5076	2 200	38 300
5081	3 400	38 700
5084	300	42 600
5085	500	40 500
5087	1 400	39 400
5089	300	43 000
5091	2 200	39 700
5094	700	41 000
5095	700	41 500
5096	300	42 100
5101	1 700	32 200
5102	2 200	34 000
5103	2 500	41 200
5104	2 600	32 500
5105	100	41 000
5106	400	41 300
5107	0	.
5109	900	40 100
5111	2 400	34 900
5113	400	38 200
5114	100	.
5121	5 200	34 400
5122	1 600	38 500
5124	500	37 500
5125	100	43 000
5126	3 100	35 600
5131	1 600	38 800
5133	1 000	40 800
5141	2 800	33 400
5142	4 400	29 700
5143	2 000	37 500
5144	3 800	34 800
5145	0	.
5146	1 100	37 200
5151	5 100	36 000
5152	2 400	38 600
5154	600	40 900
5161	3 900	35 500
5165	2 000	38 100
5171	5 600	34 900
5172	1 100	38 700
5175	2 500	38 700
5176	200	45 000
5211	7 200	32 200
5212	3 300	32 700
5213	3 800	28 700
5215	2 600	28 000
5216	3 500	32 200
5221	2 200	49 000
5222	100	.
5223	5 600	30 300
5224	3 500	30 300
5231	4 700	29 000
5232	300	54 900
5233	3 700	31 500
5234	0	.
5235	3 300	33 800
5236	2 300	45 500
5237	3 800	42 600
5241	2 700	38 400
5242	1 900	47 100
5243	1 100	37 800
5244	1 200	39 500
5245	900	41 400
5246	2 800	33 900
5247	2 800	43 800
5248	500	49 400
5249	100	43 600
5251	4 800	36 800
5252	900	37 900
5253	900	38 400
5254	700	42 800
5256	2 300	35 900
5258	3 800	40 200
5261	3 100	36 400
5262	5 600	36 800
5263	1 600	59 300
5264	0	.
5266	300	41 700
5268	1 800	43 000
5271	4 100	41 200
5272	700	37 100
5275	1 600	39 200
5281	3 000	34 200
5282	2 900	32 400
5283	4 900	37 100
5291	500	41 000
5292	100	.
5293	200	38 300
5294	100	.
5296	900	41 200
5298	1 900	40 600
5301	4 300	36 200
5302	600	41 400
5305	600	37 700
5306	1 100	36 900
5307	300	36 900
5308	800	36 900
5311	900	38 900
5313	300	41 700
5314	600	42 800
5315	200	45 900
5316	100	44 800
5317	500	41 100
5318	0	.
5321	1 900	38 600
5324	1 300	37 700
5325	400	39 800
5327	300	42 100
5328	1 100	38 800
5331	3 000	35 900
5333	100	.
5334	600	40 100
5335	200	41 100
5341	3 500	26 800
5342	2 900	35 100
5343	2 200	35 800
5344	3 700	29 700
5345	5 900	37 600
5346	2 700	37 800
5347	300	42 100
5348	4 100	28 600
5349	100	41 900
5351	3 600	38 700
5361	3 700	34 100
5363	400	35 400
5364	400	42 300
5366	600	36 600
5367	300	39 900
5368	300	39 900
5371	2 200	39 700
5373	1 100	38 200
5374	2 700	38 500
5375	700	38 100
5381	200	37 100
5382	600	35 500
5383	200	44 000
5384	5 000	38 100
5386	1 700	39 800
5388	2 400	37 900
5391	1 300	40 500
5392	300	42 100
5394	400	39 400
5395	100	.
5396	300	46 000
5397	1 200	38 200
5398	500	39 100
5401	4 300	29 100
5402	3 400	32 100
5403	3 800	36 800
5404	1 400	40 100
5405	100	.
5406	2 200	43 500
5408	1 400	36 600
5409	700	38 500
5411	2 400	38 600
5421	5 300	33 400
5422	1 200	37 400
5423	800	34 000
5424	400	40 200
5425	600	41 600
5427	3 100	37 000
5428	600	38 800
5431	5 000	30 200
5432	2 600	36 300
5433	200	43 600
5434	500	38 100
5435	200	40 200
5437	700	38 900
5438	500	37 800
5439	100	45 300
5441	900	37 800
5443	1 100	38 800
5445	300	40 000
5446	1 100	38 400
5447	600	41 400
5449	0	.
5451	2 500	34 600
5453	900	38 700
5454	600	37 400
5455	400	39 800
5461	2 100	31 800
5462	1 200	30 400
5463	2 800	34 800
5464	2 100	41 400
5465	600	40 400
5466	500	40 600
5467	3 100	39 000
5469	2 500	40 200
5471	0	.
5472	400	39 400
5473	3 000	39 200
5476	600	39 700
5481	4 000	36 900
5482	5 500	35 100
5491	4 200	39 500
5492	3 100	34 500
5501	2 200	31 300
5502	2 100	40 400
5503	2 700	31 900
5504	2 700	37 400
5505	1 600	31 200
5506	1 200	38 700
5507	700	49 300
5508	4 200	41 100
5509	1 300	41 300
5511	500	42 800
5512	800	42 700
5513	700	41 600
5521	4 000	38 000
5524	600	39 600
5525	600	39 300
5527	2 100	37 100
5528	900	38 000
5529	400	40 800
5531	4 200	36 500
5534	300	40 300
5541	3 400	36 200
5551	3 700	37 200
5552	3 000	30 300
5553	800	38 300
5554	4 300	33 300
5555	1 500	34 900
5556	500	41 800
5561	900	42 800
5563	800	37 700
5571	4 300	37 400
5575	1 200	34 800
5581	2 600	43 200
5582	2 200	42 200
5583	2 200	43 400
5591	4 000	40 300
5595	1 800	39 900
5611	5 500	33 000
5612	5 000	25 500
5613	2 600	35 600
5614	1 800	32 200
5615	3 300	34 100
5616	5 300	29 400
5617	100	22 900
5621	1 900	23 800
5622	3 700	27 200
5623	5 300	27 900
5624	2 600	33 600
5625	4 900	27 100
5626	1 500	46 800
5627	5 200	37 700
5628	4 500	30 900
5629	3 200	48 200
5631	2 600	40 200
5632	6 000	31 900
5633	0	.
5641	3 500	29 700
5642	3 300	26 700
5643	3 700	27 800
5644	3 600	37 200
5645	1 800	33 700
5646	1 000	40 300
5647	0	.
5651	1 100	26 800
5652	3 500	27 600
5653	3 300	29 700
5654	4 700	26 200
5655	1 800	36 900
5656	0	.
5657	100	.
5658	3 700	41 100
5661	500	46 400
5662	1 200	39 700
5663	2 500	42 400
5664	2 300	31 300
5665	2 600	28 200
5666	1 700	32 800
5667	1 800	33 700
5671	2 500	38 400
5672	3 000	40 200
5673	2 500	44 100
5674	1 700	41 400
5681	300	42 200
5682	1 400	41 700
5683	2 900	35 200
5684	4 400	35 000
5685	2 600	48 600
[truncated: 2,036 more rows]
